# Supplementary material
Source: HighWire-hosted journal article supplement (https://erj.ersjournals.com/content/61/2/2200910)
Supplement: inline-supplementary-material-1 [file inline-supplementary-material-1.pdf]

**Online supplement for “In critically ill patients, anti-anaerobic antibiotics increase risk of adverse clinical outcomes”**

**Authors:** Rishi Chanderraj<sup>1,2</sup>, Jennifer M. Baker<sup>3,4</sup>, Stephen G. Kay<sup>3</sup>, Christopher A. Brown<sup>3,5</sup>, Kevin J. Hinkle<sup>3</sup>, Daniel J. Fergle<sup>3</sup>, Roderick A. McDonald<sup>3</sup>, Nicole R. Falkowski<sup>3</sup>, Joseph D. Metcalf<sup>3</sup>, Keith S. Kaye<sup>6</sup>, Robert J. Woods<sup>1,2,7</sup>, Hallie C. Prescott<sup>3,8,9</sup>, Michael W. Sjoding<sup>3,7,8,10</sup>, Robert P. Dickson<sup>3,4,10</sup>

**Affiliations:**

1. Division of Infectious Diseases, Department of Internal Medicine, University of Michigan Medical School, Ann Arbor, MI, USA.
2. Medicine Service, Infectious Diseases Section, Veterans Affairs (VA) Ann Arbor Healthcare System, Ann Arbor, Michigan, USA.
3. Division of Pulmonary and Critical Care Medicine, Department of Internal Medicine, University of Michigan Medical School, Ann Arbor, MI, USA.
4. Department of Microbiology and Immunology, University of Michigan Medical School, Ann Arbor, MI, USA.
5. Institute for Research on Innovation and Science, Institute for Social Research, University of Michigan
6. Division of Infectious Diseases, Department of Medicine, Rutgers-New Jersey Medical School
7. Computational Medicine and Bioinformatics, University of Michigan Medical School, Ann Arbor, MI, USA.
8. Institute for Healthcare Policy and Innovation, University of Michigan, Ann Arbor, Michigan.
9. VA Center for Clinical Management Research, Ann Arbor, Michigan.
10. Weil Institute for Critical Care Research & Innovation; Ann Arbor, Michigan

## **Supplemental Methods**

### **Ethics statement**

All analyses of human data were approved by the University of Michigan Institutional Research Board (HUM00102282 and HUM00104714). All animal studies were approved by the Institutional Animal Care and Use Committee at the University of Michigan (PRO00009673). Laboratory animal care policies at the University of Michigan follow the Public Health Service Policy on Humane Care and Use of Laboratory Animals.

### **Study design and rationale**

We designed a retrospective cohort study of patients admitted to one of the six intensive care units at the University of Michigan through the period of 2016-2019. We included patients who received mechanical ventilation for at least 72 hours and were treated with intravenous antibiotics up to 72 hours prior to mechanical ventilation. We excluded patients who were mechanically ventilated for less than 72 hours, and patients transferred from an outside medical facility. For patients with multiple hospital admissions during the study period, we recorded data for the first hospitalization only.

### **Identification of eligible subjects**

Eligible patients were identified through a Structured Query Language (SQL) query of the University of Michigan's Research Data Warehouse. We extracted ventilatory support documentation from nursing flowsheets to capture which patients were mechanically ventilated for over 72 hours. We next extracted information regarding medication orders from the medication administration record. We identified all antimicrobial administrations for the population using a list of search terms that captured every antibiotic available on our hospital formulary during the study period (**Supplemental Table S1**).

### **Identification of outside facility transfers**

We performed a text search of the available documentation in the electronic medical record to identify patients who were potentially transferred from an outside facility using the University of Michigan's Electronic Medical Record Search Engine (EMERSE)<sup>1,2</sup>. We used a defined list of search terms to identify patients potentially transferred from an outside hospital (**Supplemental Table S2**). Those patients with the search terms present in either a hospital transfer note or admission History and Physical underwent physician adjudication to confirm that they were not directly admitted to the University of Michigan hospital. Patients confirmed to have been transferred from an outside facility were excluded from the cohort.

### **Classification of anti-anaerobic activity of administered antibiotics**

Antibiotics were classified as "anti-anaerobic" based on widely accepted clinical criteria. Namely, "anti-anaerobic antibiotics" are agents recommended for treatment of anaerobic pathogens isolated in odontogenic infections<sup>3,4</sup>, deep-space neck infections<sup>5</sup>, diabetic foot ulcers<sup>6</sup>, intraabdominal sepsis<sup>7</sup>, and necrotizing skin infection<sup>8</sup> based on guidelines from Infectious Diseases Society of America and other major medical associations. Prior studies have found that antibiotics meeting this definition of "anti-anaerobic" activity cause greater disruption to gut microbiota than other antibiotics when measured with both culture-dependent techniques<sup>9-12</sup> and culture-independent (sequencing-based) techniques<sup>13-15</sup>. For agents with variable activity against anaerobic pathogens, we considered pharmacokinetic and pharmacodynamic profiles of the antibiotic and data from observational studies of the impact of these medications on gut microbiota when considering how they should be classified. We ultimately decided to classify agents with variable activity as anti-anaerobic if they met two criteria: 1) intravenous formulations of the medication achieved high concentrations in the gut

lumen; and 2) they have consistently associated with significant gut microbiota disruption in observational studies of humans. A complete listing of the antibiotics considered anti-anaerobic is listed in **Supplemental Table 3**. A summary of antimicrobial use by anti-anaerobic classification is presented in **Supplemental Table 5** and **Supplemental Figure 1**.

### **Primary Outcome: VAP-free survival**

As a primary outcome, we used a composite outcome of VAP or in-hospital death, defined as “VAP-free survival”: the time from the initiation of mechanical ventilation to the time VAP onset or death. We chose this endpoint because 1) it is a validated measure used in randomized clinical trials for VAP prevention<sup>16–19</sup> and 2) it addresses threats to validity introduced by competing risks (e.g., patients may die before they have the opportunity to develop VAP, or may die due to VAP before it can be diagnosed). Patients were censored from survival analysis at the time of hospital discharge if they were discharged prior to 30 days.

### **VAP adjudication**

VAP was diagnosed using a streamlined version of CDC surveillance criteria for VAP, previously shown to be highly reliable and predictive of patient outcomes<sup>20–22</sup> (**Table 1**, main manuscript). To be eligible to be considered as having developed VAP, an endotracheal aspirate **or** BAL culture must have been collected during a patient’s time on mechanical ventilation. The date of collection of this respiratory sample served as a timestamp for VAP development.

All of the following criteria within the 96 hours preceding or following collection of sputum culture had to be fulfilled to be considered a case of VAP:

- I. Sustained two days of increasing daily minimum  $\text{FiO}_2 \geq 0.15$  or  $\text{PEEP} > 2.5 \text{ mm H}_2\text{O}$  as determined by the validated screening algorithm for ventilator-associated complications.
  - a. For PEEP
    - i. Day -3 Minimum  $\text{PEEP} \leq$  Day -2 Minimum PEEP, if not, then stop and do not advance to next step in algorithm
    - ii. Day -2 Minimum  $\text{PEEP} + 2.5 \text{ mm Hg} \leq$  Day -1 Minimum PEEP, if not then no VAP do not advance to next step in algorithm
    - iii. Day -1 Minimum  $\text{PEEP} + 2.5 \text{ mm Hg} \leq$  Day 0 Minimum PEEP (day of sputum collection) Then patient meets criteria for increased PEEP
  - b. For  $\text{FiO}_2$ 
    - i. Day -3 Minimum  $\text{FiO}_2 \leq$  Day -2 Minimum  $\text{FiO}_2$ , if not, then stop and do not advance to next step in algorithm
    - ii. Day -2 Minimum  $\text{FiO}_2 + 0.15 \leq$  Day -1 Minimum  $\text{FiO}_2$  if not then do not advance to next step in algorithm
    - iii. Day -1 Minimum  $\text{FiO}_2 + 0.15 \leq$  Day 0 (day of sputum collection) Minimum  $\text{FiO}_2$  Then patient meets criteria for increased  $\text{FiO}_2$
- II. One or both of the following systemic symptoms
  - a. Fever ( $>38^\circ \text{C}$ )
  - b. Leukocytosis ( $>12,000 \text{ WBC}$ ) or Leukopenia ( $<4000 \text{ WBC}$ )

At least one of the following changes in sputum had to be met to be considered VAP:

- III. Pulmonary inflammation as evidenced by the presence of alveolar neutrophils:
  - a.  $>26$  neutrophils per high power field on gram stain of endotracheal aspirate (read as moderate PMNs on gram stain)
  - b.  $>500 \text{ WBC}$  on BAL fluid

- IV. Either bacterial growth with known pathogens or growth of *Aspergillus* mold species on endotracheal aspirate or BAL culture

Patients who met all other criteria for VAP but did not grow a pathogen on respiratory culture were categorized as having “probable VAP,” while patients who met all criteria were categorized as having “confirmed VAP.” Time of VAP onset was defined as time of respiratory culture collection.

### **Secondary Outcomes: Infection-free Survival and Mortality**

In addition to VAP, we characterized all nosocomial infections in the cohort. We defined nosocomial infections as a culture-confirmed infection that was not present on admission, grown from a site typically considered “sterile” (blood, urine, ascites fluid, cerebrospinal fluid, deep tissue culture, or lower respiratory tract specimen), meeting clinical criteria set by major medical societies<sup>8,23–26</sup>. We used the time of culture acquisition, death, or discharge to calculate “infection-free survival.” Nosocomial infections were adjudicated by an Infectious Diseases-trained physician who was blinded to primary exposure (receipt of anti-anaerobic antibiotics). Mortality was adjudicated via chart review. We determined each patient’s vital status at 30 days via review of the electronic medical record, as well via the Michigan Department of Health and Human Services Genealogical Death Indexing Services<sup>27</sup> and CDC National Death Index<sup>28</sup>.

### **Cause of death determination**

Death certificates and the discharge summary in the electronic medical record were processed using the CDC National Vital Statistics System’s Instruction for Classification of Underlying and Multiple Causes of Death – 2022<sup>29</sup>, to assign a cause of death to the decedents in the cohort. This process that has previously been used to document and report life expectancy and mortality rates in the United States<sup>30</sup>.

We first used the EMERSE search engine to identify and pull text from the death note from all decedents in the cohort. The death note in the EMR at the University of Michigan adheres closely to the structure of the U.S. Standard Certificate of Death and provides spaces for the certifying physician to record information concerning the diseases, conditions and injuries which resulted in or contributed to death. Specifically, a physician is requested to report both the immediate cause of death, and the antecedent conditions which gave rise to the listed immediate cause of death.

We followed the selection rules of the General Principle outlined by the National Vital Statistics Instructions for Classification of Underlying and Multiple Causes of Death<sup>29</sup>. The General Principle states, “When more than one condition is entered on the [death] certificate, the condition entered alone on the lowest line of Part I [containing the diseases, conditions, and injury which resulted in or contributed to death] should be selected if it could only have given rise to all conditions entered above it.” Thus, in most cases, a physician adjudicator selected the diagnosis listed last in the death note as the cause of death, as this was the cause of death that the treating medical team deemed to be the condition which gave rise to all the conditions entered above it.

In cases when the General Principle was violated, we followed the selection rules outlined in the Instructions:

- I. Rule 1: If the General Principle does not apply and there is a reported sequence terminating in the condition first entered on the certificate, select the originating cause of this sequence. If there is more than one sequence terminating in the

condition mentioned first, select the originating cause of the first-mentioned sequence

- a. Example provided by Instructions:
  - i. Recorded diagnoses
    1. Bronchopneumonia
    2. Cerebral infarction and hypertensive heart disease
  - ii. General principle is violated as there are 2 diagnoses on the lowest line used
  - iii. Cerebral infarction is selected, since this is the first mentioned originating cause
- II. Rule 2: If there is no reported sequence terminating in the condition entered on the certificate, select this first mentioned condition.
  - a. Example provided by Instructions:
    - i. Recorded diagnoses
      1. Pernicious anemia and gangrene of foot
      2. Atherosclerosis
    - ii. General principle is violated as Pernicious anemia due to atherosclerosis is not an acceptable sequence.
    - iii. The reported sequence of gangrene of the foot due to atherosclerosis does not terminate in the condition first entered in certificate
    - iv. Pernicious anemia is selected
- III. Rule 3: If the condition selected by the General Principle or by Rule 1 or Rule 2 is obviously a direct consequence of another reported condition, whether in Part I or Part II, select this primary condition
  - a. A full list of "obvious consequences" can be found at <https://www.cdc.gov/nchs/nvss/manuals/2022/2a-sectionii-2022.htm>
  - b. Notable frequent uses of the "obvious consequence guidance" among decedents in the cohort were as follows:
    - i. Dehydration as an obvious consequence of intestinal infectious diseases
    - ii. Acute renal failure as an obvious consequence of urinary tract infection, provided that renal failure was absent before urinary tract infection.
    - iii. Arterial embolism as an obvious consequence of atrial fibrillation
    - iv. Secondary or unspecified anemia, malnutrition, or cachexia as an obvious consequence of malignant neoplasm
    - v. An operation on a given organ is a direct consequence of any surgical condition (such as malignant tumor or injury) of the same organ reported anywhere on the certificate.

A physician adjudicator followed the instructions outlined and pulled the free text diagnosis listed in the death note as the cause of death. An ICD-10 code was then assigned using computer-assisted coding incorporated as part of the Epic® EMR software (Epic Systems Corporation, Madison, WI) utilized by the University of Michigan. The Epic software integrates clinical documentation and billing information by providing a proprietary reference terminology that allows clinicians to search for and display diagnostic concepts that clinicians find meaningful while maintaining a mapped connection to ICD-10 codes for reporting and financial support purposes. This system is integrated into the EPIC system as a free-text query field, in which a clinician enters an abbreviation or string of characters, which is then used by the EHR to return results based on relevance to the search string and ranks them in list according to differentiating logic for complete word or partial word matching. An example frequently used in the process: a search initiated by typing "CAD" returned diagnostic codes I25\* (where \*

represents 0 or more alphanumeric characters), and an ICD-10 code of I25 was assigned to this free-text search.

After an ICD-10 code was assigned as a diagnosis cause of death, we used the categories previously used to report life expectancy and mortality rates in the United States to bin decedents into broad categories of causes of death, with two notable additions and modifications (**Supplemental Table S4**).

- 1) We added a category of Liver disease with diagnoses that included ICD-10 codes of K7\* representing cirrhosis of the liver
- 2) We included diagnoses of S06\*, which encapsulated traumatic brain injury and diagnoses of intracerebral hemorrhage, as Neurologic conditions.

The S06\* addition was added as it was frequently not captured by the classification bins used to report mortality rates. Liver disease was classified as distinct as general gastrointestinal disease, as previous studies have shown that patients with cirrhosis have significant shifts in gut microbiota.

### **Statistical analysis of clinical data**

All analyses were performed using the R programming statistical programming language (v 4.1.2)<sup>31</sup>. We compared baseline demographics of age, race, gender, frequency of medical comorbidities, weighted Charlson Comorbidity Index<sup>32-34</sup>, the Acute Physiology and Chronic Health Evaluation Score (APACHE IV) within 24 hours of initiation of mechanical ventilation, and the proportion of patients admitted to each hospital unit between treatment groups with the two sample independent t-test.

We constructed Kaplan-Meier curves to determine the median VAP-free, infection-free, and all-cause survival. We used a stratified log-rank statistic to determine the statistical significance of differences in survival between groups. We built Cox proportional hazards models incorporating early treatment with anti-anaerobic antibiotics, hospital unit of admission, age, gender, race, weighted Charlson comorbidity score, and the APACHE IV calculated within 24 hours of initiation of mechanical ventilation between groups (**Supplemental Table S5, S7, S8**). The proportional hazards assumption for variables included in the model was tested with a goodness of fit test of correlation between Schoenfeld residuals and time<sup>35</sup> (**Supplemental Figure S4**). All survival analysis was done with the *survival*<sup>36</sup> (v 3.1-8) package in R.

We then built a logistic regression model using an outcome 30-day VAP free survival as a binary variable (alive and VAP-free at 30-days or not). We used early treatment with anti-anaerobic antibiotics, hospital unit of admission, age, gender, race, weighted Charlson comorbidity score, and APCHE IV score calculated within 24 hours of admission as the independent predictors of 30-day VAP-free survival in this model (**Supplemental Table S6**). We then used the *margins*<sup>37</sup> package in R to calculate the average marginal effect of all covariates to determine the independent effect of early anti-anaerobic antibiotic treatment on VAP free survival.

To compare rates of VAP independently (rather than within a composite outcome), we compared the cumulative incidence VAP in 30 days for each treatment group and determined the estimated marginal probability of VAP in 30 days. We compared VAP-specific cumulative incidence functions between groups with Gray's test<sup>44</sup>. Competing risk analysis was performed with the *cmprsk* (v 2.2-6) 45 package in R.

We compared the overall distributions of bacterial pathogens between anti-anaerobic treated and untreated patients with Chi-Square testing and compared the frequency of individual bacterial pathogens between treatment groups with two sample independent t-testing. All statistical tests used  $p=0.05$  as a threshold for significance.

### **Microbiome analysis of rectal swab specimens**

We performed a secondary analysis of bacterial community data generated for a previously published study<sup>38,39</sup>. Briefly, we characterized the gut microbiota present in rectal swabs collected from 116 hospitalized patients admitted to the University of Michigan Hospital in 2016. The infection control practice throughout the study period was to perform routine surveillance for Vancomycin-Resistant *Enterococcus* (VRE) using rectal swabs on eight adult hospital units, including intensive care units and the bone marrow transplant ward. All hospitalized patients had routine collection of rectal swabs on admission and weekly thereafter to screen for VRE. In the prior study, we studied gut microbiome communities in 232 rectal swab samples from 58 matched pairs of case and control subjects (defined by nosocomial infection of VRE). Patient characteristics, bacterial DNA isolation, bacterial DNA quantification, 16S rRNA gene amplicon sequencing, and microbiome analysis have previously reported<sup>38,39</sup>. We built a mixed effects multivariable linear regression model using, age, gender, race, weighted Charlson comorbidity score, APACHE IV score at admission, and early treatment with anti-anaerobic antibiotics to predict log-transformed bacterial density and the relative abundance of *Enterobacteriaceae* over time. We included an interaction term of anti-anaerobic antibiotic treatment and time in these models to compare the daily change in bacterial density and relative abundance of *Enterobacteriaceae* between anti-anaerobic treated patients and untreated patients. We used the *lme4* package in R<sup>40</sup> to build the mixed effects models.

### **Murine modeling**

Mice (8-10 week old female C57BL/6) were obtained from Jackson Laboratories (Bar Harbor, ME, USA). Mice were housed in colony cages at 21°C with a 12:12-hour light-dark cycle and had *ad libitum* access to regularly changed water and standard chow (Envigo Teklad, Indianapolis, IN, USA). Prior to experimental start, mice were allowed to acclimate under specific pathogen-free conditions for one week, with subsequent transfer to BSL2 containment housing for the experimental duration. All experiments were conducted with approval from the University of Michigan Institutional Animal Care and Use Committee.

All antibiotics were suspended in sterile 0.9% saline and administered via intraperitoneal injection of 200  $\mu$ l, such that mice received the following dosages: 40 mg/kg aztreonam, 30 mg/kg cefepime, 67.5 mg/kg piperacillin/tazobactam total (8 parts piperacillin to 1 part tazobactam), or saline alone (sham).

### *Experimental details*

To avoid direct antibiotic interactions with the inoculum, mice were pre-treated with either sham, cefepime, or piperacillin/tazobactam daily for three days and allowed a washout period of 24 hours prior to inoculation. *S. aureus* or *K. pneumoniae* inocula were prepared as follows: 1) freezer stock was streaked on an LB agar plate (Lennox formulation [5 g/L NaCl] for *S. aureus* and Miller formulation [10 g/L NaCl] for *K. pneumoniae*) and incubated at 37°C for 24 hours, 2) five colonies were used to inoculate 50 mL of LB broth (same formulation as agar plates for respective species), which was incubated overnight (16-18 hours), and 3) 10 mL of overnight bacterial batch culture was centrifuged at 3,000 rpm for 10 min to pellet cells and washed twice with sterile PBS before diluting to the final concentration for the inoculum.

To inoculate each mouse,  $10^7$  CFU (range:  $2.9 \times 10^7$  –  $5.8 \times 10^7$ ) of methicillin-resistant *S. aureus* (MRSA USA300, strain NRS384) or  $10^6$  CFU (range:  $4.5 \times 10^6$ –  $9.0 \times 10^6$ ) was suspended in 50  $\mu$ l of sterile phosphate-buffered saline (PBS) and instilled intratracheally via oropharyngeal aspiration under ketamine/xylazine anesthesia. Mock-infected control mice underwent a similar procedure, using 50  $\mu$ l of sterile PBS instead of the bacterial suspensions. Following anesthesia, mice were then monitored until ambulatory and harvested 24 hpi to collect either bronchoalveolar lavage (BAL) fluid or whole lung tissue.

For the hyperoxia experiments, oxygen was administered to mice by placing their cages in a sealed chamber (BioSpherix) with medical-grade 100% oxygen ( $0.1$  to  $99.9 \pm 0.1\%$ ) delivered continuously via a ProOx110 controller to maintain chamber oxygen levels. Antibiotics were delivered concurrently with oxygen exposure on days 0, 1, and 2 (for 3 day endpoint experiments) or days 0, 1, 2, and 3 (for 4 day endpoint experiments). To control for cage effect, antibiotic and sham-treated mice were cohoused, either in the oxygen chamber at  $95\% \text{ FiO}_2$  or on the standard housing rack at  $21\% \text{ FiO}_2$  (room air controls). Mice were removed from the chamber for about 20 minutes to complete the antibiotic injections and placed immediately back into the oxygen chamber to resume oxygen administration. Mice were harvested on day 3 or 4 to collect BAL fluid.

To assess survival during concurrent antibiotic and hyperoxia exposure, mice were monitored for moribundity and mortality every 12 hours during the 4 day timecourse. Weight loss at time of intraperitoneal antibiotic administration was recorded and visual inspection to assess general appearance, respiration, locomotion, and behavior was conducted every twelve hours. A threshold of  $>20\%$  body weight loss, visual inspection revealing marked dyspnea and loss of locomotive control to the extent requiring humane euthanasia, or death within 10 minutes upon removal from oxygen chamber during cage transport at the endpoint was considered time of death. All other mice were considered as surviving and euthanized at 4 day endpoint for tissue collection. Tissue samples from non-surviving mice were not analyzed to avoid survivor bias.

#### *Murine tissue collection and processing*

Both types of lung samples collected for this study were harvested and processed according to previously published protocols<sup>41–43</sup>. Briefly, murine whole lung tissue was excised using sterile instruments, placed in tubes containing 1 mL sterile water, and mechanically homogenized using a Tissue-Tearor (Biospec Products, Bartlesville, OK). The tissue homogenizer was cleaned and rinsed in ethanol and water between each tissue sample. Water control specimens from homogenization rinsed with clean instruments were included as controls when plating whole lung tissue to determine *S. aureus* load.

Bronchoalveolar lavage fluid was collected via (1) sterile dissection to expose and make a small incision in the trachea, (2) insertion of sterile 0.58 mm tubing and connected 23-gauge sterile syringe needle into the incision, (3) tightening of sterile surgical thread around the intubated trachea to seal, and (4) two rounds of instillation and retrieval of 1 mL of sterile PBS into the lungs using a sterile 1 mL syringe. Each tubing-needle-syringe setup was rinsed thoroughly with sterile PBS between the collection of each sample. Sterile PBS used for lavage and PBS rinses of the tubing-needle-syringe setup (pre- and post-lavage) were collected as controls. BAL fluid was prepared by pooling the two serial lavages from each mouse, yielding up to 2 mL total BAL fluid per mouse. Pooled BAL fluid was centrifuged at 13,000 rpm for 30 min. For hyperoxia experiments, supernatant was removed and stored in aliquots at  $-20^\circ\text{C}$  until further analysis. For *S. aureus* inflammation experiments, the BAL fluid cell pellet was used for leukocyte cell counts and differentials.



### *Murine tissue analysis*

Lung injury was assessed using quantification of total protein and IgM in bronchoalveolar lavage fluid. Protein was quantified colorimetrically using the Bradford assay (Bio-Rad, Hercules, CA) with bovine serum albumin as the standard. Alveolar IgM was quantified using the IgM Mouse Uncoated enzyme-linked immunosorbent assay (ELISA) Kit (Thermo Fisher Scientific, Waltham, MA).

Lung bacterial culture was performed using up to eleven 10-fold serial dilutions of lung homogenate from *S. aureus*- or *K. pneumoniae*-infected mice with sterile PBS as the diluent. 10  $\mu$ l of each serial dilution and the original lung homogenate were plated on square LB agar plates in duplicate using an adjustable electronic multichannel pipette (limit of detection: 50 CFU) . Plates were incubated overnight at 37°C, and colony-forming units (CFU) were counted the following day in the first dilution where defined colonies were visible. Control samples (e.g., mock-infected lung homogenate, water from homogenization, PBS from homogenate dilution) were also plated to identify sources of contamination. Colonies with morphology consistent with normal respiratory tract bacteria identified in the mock-infected controls were excluded from CFU determination.

Alveolar leukocytes were resuspended in 100  $\mu$ l of RPMI media supplemented with 5% fetal bovine serum. Leukocytes were then further diluted with red blood cell lysis buffer and then counted using a standard hemocytometer. Slides for alveolar leukocyte differential counts were prepared by Cytospin of 100  $\mu$ l of 1:3 dilution of resuspended cell pellet in RPMI + 5% FBS, allowed to dry, and then stained using a modified Wright-Giemsa staining protocol. Two hundred cells were counted per mouse. Leukocyte counts were divided by paired total cell count to obtain estimates of alveolar leukocyte counts for monocytes/macrophages, neutrophils, lymphocytes, eosinophils, and basophils.

## Supplemental Tables and Figures

### Supplemental Table S1. Antibiotic search terms

|                                        |                                 |                                                  |
|----------------------------------------|---------------------------------|--------------------------------------------------|
| Cephalexin [2231]                      | Ciprofloxacin [2551]            | Aztreonam [1272]                                 |
| Cephadrine [2239]                      | Levofloxacin [82122]            | Linezolid [190376]                               |
| Cefdinir [25037]                       | Ofloxacin [7623]                | Rifaximin [35619]                                |
| Cefuroxime [2194]                      | Moxifloxacin [139462]           | Rifampin [9384]                                  |
| Cefpodoxime [20489]                    | Norfloxacin [7517]              | Rifabutin [55672]                                |
| cefTRIAxone [2193]                     | Besifloxacin [819911]           | Rifapentine [35617]                              |
| Cefepime [20481]                       | Gatifloxacin [228476]           | Isoniazid/Rifampin [6038/9384]                   |
| ceFAZolin [2180]                       | Gemifloxacin [138099]           | Isoniazid/Pyrazinamide/Rifampin [6038/8987/9384] |
| Cefadroxil [2177]                      | Trovafoxacin [115552]           | Sulfamethoxazole/Trimethoprim [10180/10829]      |
| Cefixime [25033]                       | Floxuridine [4488]              | Sulfamethoxazole [10180]                         |
| cefTAZidime [2191]                     | Ertapenem [325642]              | sulfiSOXAZOLE [10207]                            |
| Cefprozil [19552]                      | Meropenem [29561]               | Fidaxomicin [1111103]                            |
| Cefaclor [2176]                        | Meropenem/Vaborbactam           | GENTAMICIN IVPB [142438/1596450]                 |
| Ceftaroline [1040005]                  | Cilastatin/Imipenem [2540/5690] | Polymyxin B/Trimethoprim [10829/8536]            |
| cefoTEtan [2187]                       | Cilastatin/Imipenem/Relbactam   | Bacitracin/Polymyxin B [1291/8536]               |
| Cefotaxime [2186]                      | Doripenem [119771]              | Neomycin/Polymyxin B [7299/8536]                 |
| cefOXitin [2189]                       | Azithromycin [18631]            | Polymyxin B [8536]                               |
| Cefditoren [83682]                     | Clindamycin [2582]              | DALBAVANCIN IVPB [1539239]                       |
| ceftolozane-tazobactam [1597609/37617] | Erythromycin [4053]             | Telavancin [473837]                              |
| Ceftibuten [20492]                     | Vancomycin [11124]              | Aztreonam [1272]                                 |
| cefTAZidime-avibactam [1603834/2191]   | Tobramycin [10627]              | Linezolid [190376]                               |
| Ceftizoxime [2192]                     | Clarithromycin [21212]          | Rifaximin [35619]                                |
| ceftaroline fosamil [1040004/1040005]  | Neomycin [7299]                 | Rifampin [9384]                                  |
| Cefiderocol                            | Fosfomycin [4550]               | Rifabutin [55672]                                |
| Amoxicillin [723]                      | DAPTOmycin [22299]              | Rifapentine [35617]                              |
| Penicillin V Potassium [7984]          | Natamycin [7268]                | Isoniazid/Rifampin [6038/9384]                   |
| Amoxicillin/Clavulanate [48203/723]    | Paromomycin [7934]              | Isoniazid/Pyrazinamide/Rifampin [6038/8987/9384] |
| Ampicillin [733]                       | Streptomycin [10109]            | Tigecycline [384455]                             |
| Dicloxacillin [3356]                   | tobramycin [10627/9853/9863]    | Oxytetracycline [7821]                           |
| Piperacillin/Tazobactam [37617/8339]   | ERYTHROMYCINS/MACROLIDES        | metroNIDAZOLE [6922]                             |
| Penicillin G Potassium [7980]          | Lincomycin [6398]               | Clavulanate/Ticarcillin [10591/48203]            |
| Nafcillin [7233]                       | Telithromycin [274786]          | cloxacillin 125 mg/5 mL Recon Soln [2625]        |
| Ampicillin/Sulbactam [10167/733]       | Doxycycline [3640]              | Bacampicillin [18687]                            |
| Piperacillin [8339]                    | Minocycline XR [6980]           | Tetracycline [10395]                             |
| Oxacillin [7773]                       | Ticarcillin [10591]             | Demeclocycline [3154]                            |

### Supplemental Table S2. Search terms used to identify outside hospital transfers

|                             |                                  |
|-----------------------------|----------------------------------|
| "Outside hospital transfer" | "Another facility"               |
| "Outside hospital"          | "Transfer from outside facility" |
| "OSH transfer"              | "Transfer from another facility" |
| "OSH txf"                   | "OSH"                            |
| "Outside facility"          | "Transfer"                       |

**Supplemental Table S3.** Antibiotic classification

| Antibiotic class                       | Antibiotic                    | Anti-anaerobic |
|----------------------------------------|-------------------------------|----------------|
| Nitroimidazole                         | Metronidazole                 | X              |
| Beta-lactam + beta-lactamase inhibitor | Piperacillin-tazobactam       | X              |
|                                        | Ampicillin-sulbactam          | X              |
|                                        | Ceftolozane-tazobactam        |                |
|                                        | Ceftazidime-avibactam         |                |
| Cephalosporin                          | Cefazolin                     |                |
|                                        | Cefoxitin                     | X              |
|                                        | Cefpodoxime                   | X              |
|                                        | Ceftriaxone                   | X              |
|                                        | Cefuroxime                    | X              |
|                                        | Ceftazidime                   |                |
|                                        | Cefepime                      |                |
| Carbapenem                             | Ceftaroline                   |                |
|                                        | Meropenem                     | X              |
|                                        | Ertapenem                     | X              |
| Glycopeptide                           | Vancomycin                    |                |
| Penicillin                             | Penicillin                    | X              |
|                                        | Amoxicillin                   | X              |
|                                        | Ampicillin                    | X              |
|                                        | Nafcillin                     |                |
|                                        | Oxacillin                     |                |
| Quinolone                              | Ciprofloxacin                 |                |
|                                        | Levofloxacin                  | X              |
|                                        | Moxifloxacin                  | X              |
| Lincomycin                             | Clindamycin                   | X              |
| Oxazolidinones                         | Linezolid                     |                |
| Lipopeptide                            | Daptomycin                    |                |
| Macrolide                              | Clarithromycin                |                |
|                                        | Erythromycin                  |                |
|                                        | Azithromycin                  |                |
| Monobactam                             | Aztreonam                     |                |
| Sulfonamide and Folic acid inhibitor   | Trimethoprim-Sulfamethoxazole |                |
| Tetracycline                           | Doxycycline                   | X              |
|                                        | Minocycline                   | X              |
|                                        | Tigecycline                   | X              |
| Rifamycin                              | Rifabutin                     |                |
|                                        | Rifaximin                     | X              |
|                                        | Rifabutin                     |                |
| Aminoglycoside                         | Tobramycin                    |                |
|                                        | Gentamicin                    |                |
| Phosphonic                             | Fosfomicin                    |                |

**Supplemental Table S4.** Cause of death classification

| Cause of Death Category | ICD-10 Codes                                                           |
|-------------------------|------------------------------------------------------------------------|
| Cardiovascular          | Diseases of the circulatory system (I00-I99)                           |
| Pulmonary               | Diseases of the respiratory system (J00-I98)                           |
| Renal                   | Renal Failure (N17-N19)                                                |
| Gastrointestinal        | Diseases of the digestive system (K00-K60; K80-K92)                    |
| Infection               | Infectious and parasitic diseases (A00-B99)                            |
| Hepatic                 | Diseases of the Liver (K70-K76)                                        |
| Neurologic              | Diseases of the nervous system (G00-G98)<br>Intracranial injury (S06)  |
| Poisoning or overdose   | Accidental drug poisoning (X40-X45)<br>Intentional self-harm (X60-X84) |
| Malignancy              | Neoplasms (C00-D48)                                                    |
| Unknown                 | Other ill-defined condition (R69) or missing death note                |

**Supplemental Table S5.** Total antibiotic use in study cohort

| Antibiotic              | Anti-anaerobic coverage (N = 1,942) | No anaerobic coverage (N = 1,090) | Difference in proportion (95% CI) | P value   |
|-------------------------|-------------------------------------|-----------------------------------|-----------------------------------|-----------|
| Cefazolin               | 0.09 (170)                          | 0.23 (254)                        | 0.15 (0.12 - 0.17)                | 1.54e-23  |
| Cefepime                | 0.272 (529)                         | 0.55 (596)                        | 0.27 (0.24 - 0.31)                | 5.25e-49  |
| Vancomycin              | 0.76 (1477)                         | 0.76 (828)                        | -0.001 (-0.033 - 0.031)           | 9.54e-01  |
| Clindamycin             | 0.07 (136)                          | 0 (0)                             | -0.07 (-0.08 - -0.06)             | 1.70e-32  |
| Piperacillin-Tazobactam | 0.57 (1107)                         | 0 (0)                             | -0.57 (-0.59 - -0.55)             | 0.00e+00  |
| Ceftriaxone             | 0.115 (224)                         | 0 (0)                             | -0.12 (-0.13 - -0.10)             | 1.17e-53  |
| Metronidazole           | 0.273 (530)                         | 0 (0)                             | -0.27 (-0.29 - -0.25)             | 1.61e-136 |
| Rifaximin               | 0.039 (76)                          | 0 (0)                             | -0.04 (-0.04 - -0.03)             | 1.35e-18  |
| Azithromycin            | 0.23 (442)                          | 0.46 (504)                        | 0.24 (0.2 - 0.27)                 | 6.71e-38  |
| Ampicillin-Sulbactam    | 0.14 (262)                          | 0 (0)                             | -0.14 (-0.15 - -0.12)             | 4.06e-63  |
| Cefuroxime              | 0.02 (44)                           | 0 (0)                             | -0.02 (-0.03 - -0.016)            | 2.58e-11  |
| Aztreonam               | 0.03 (61)                           | 0.027 (29)                        | -0.01 (-0.02 - 0.01)              | 4.44e-01  |
| Levofloxacin            | 0.03 (49)                           | 0 (0)                             | -0.03 (-0.03 - -0.02)             | 1.89e-12  |
| TMP-SMX                 | 0.04 (84)                           | 0.036 (39)                        | -0.0` (-0.02 - 0.01)              | 3.05e-01  |
| Meropenem               | 0.05 (90)                           | 0 (0)                             | -0.05 (-0.06 - -0.04)             | 8.32e-22  |
| Cefoxitin               | 0.01 (26)                           | 0 (0)                             | -0.01 (-0.02 - -0.01)             | 3.15e-07  |
| Doxycycline             | 0.03 (53)                           | 0 (0)                             | -0.03 (-0.04 - -0.02)             | 2.34e-13  |
| Rifampin                | 0.02 (30)                           | 0 (0)                             | -0.02 (-0.021 - -0.01)            | 3.88e-08  |
| Linezolid               | 0.03 (50)                           | 0.007 (8)                         | -0.02 (-0.03 - -0.01)             | 3.32e-05  |
| Erythromycin            | 0.01 (15)                           | 0.003 (3)                         | -0.005 (-0.01 - 0)                | 5.07e-02  |
| Ciprofloxacin           | 0.01 (23)                           | 0.01 (7)                          | -0.005 (-0.012 - 0.001)           | 1.16e-01  |
| Gentamicin              | 0.01 (21)                           | 0.02 (20)                         | 0.01 (-0.002 - 0.02)              | 1.09e-01  |
| Minocycline             | 0.002 (4)                           | 0 (0)                             | -0.002 (-0.004 - 0)               | 4.55e-02  |
| Ampicillin              | 0.03 (55)                           | 0 (0)                             | -0.03 (-0.04 - -0.02)             | 8.23e-14  |
| Fosfomycin              | 0.002 (3)                           | 0.004 (4)                         | 0.002 (-0.002 - 0.01)             | 2.97e-01  |
| Penicillin              | 0.004 (8)                           | 0 (0)                             | -0.004 (-0.01 - -0.001)           | 4.65e-03  |
| Moxifloxacin            | 0.005 (10)                          | 0 (0)                             | -0.01 (-0.01 - -0.002)            | 1.55e-03  |
| Tobramycin              | 0.01 (27)                           | 0.004 (4)                         | -0.01 (-0.02 - -0.004)            | 1.54e-03  |
| Amoxicillin             | 0.004 (8)                           | 0.003 (3)                         | -0.001 (-0.01 - 0.003)            | 5.25e-01  |
| Daptomycin              | 0.012 (24)                          | 0.003 (3)                         | -0.01 (-0.02 - -0.004)            | 1.22e-03  |
| Ceftazidime             | 0.001 (2)                           | 0.004 (4)                         | 0.003 (-0.001 - 0.01)             | 1.81e-01  |
| Nafcillin               | 0.01 (17)                           | 0.006 (7)                         | -0.002 (-0.01 - 0.004)            | 4.68e-01  |
| Rifabutin               | 0.001 (2)                           | 0 (0)                             | -0.001 (-0.002 - 0)               | 1.57e-01  |
| Tigecycline             | 0.001 (1)                           | 0 (0)                             | -0.001 (-0.002 - 0)               | 3.17e-01  |
| Ceftaroline             | 0.003 (5)                           | 0 (0)                             | -0.003 (-0.01 - 0)                | 2.53e-02  |
| Ceftolozane-Tazobactam  | 0.002 (4)                           | 0 (0)                             | -0.002 (-0.004 - 0)               | 4.55e-02  |
| Ertapenem               | 0.002 (3)                           | 0 (0)                             | -0.002 (-0.003 - 0)               | 8.33e-02  |
| Oxacillin               | 0.001 (1)                           | 0 (0)                             | -0.001 (-0.002 - 0)               | 3.17e-01  |
| Cefpodoxime             | 0.001 (1)                           | 0.001 (1)                         | 0 (-0.002 - 0.002)                | 7.02e-01  |
| Clarithromycin          | 0.002 (3)                           | 0 (0)                             | -0.002 (-0.003 - 0)               | 8.33e-02  |

Values reported as proportion (N).

**Supplemental Table S6.** Culture-identified pathogens in VAP

| Organism                       | Anti-anaerobic coverage<br>(N = 1,942) | No anaerobic coverage<br>(N = 1,090) | P value |
|--------------------------------|----------------------------------------|--------------------------------------|---------|
| No growth ("Probable VAP")     | 5 (0.07)                               | 7 (0.25)                             | 0.049   |
| <i>Staphylococcus</i> spp.     | 11 (0.15)                              | 8 (0.29)                             | 0.17    |
| <i>Corynebacterium</i> spp.    | 3 (0.04)                               | 1 (0.04)                             | 0.90    |
| <i>Enterobacteriaceae</i> spp. | 35 (0.48)                              | 6 (0.21)                             | 0.009   |
| <i>Pseudomonas</i> spp.        | 8 (0.11)                               | 4 (0.13)                             | 0.67    |
| <i>Streptococcus</i> spp.      | 7 (0.10)                               | 2 (0.071)                            | 0.69    |
| <i>Stenotrophomonas</i> spp.   | 3 (0.04)                               | 0 (0)                                | 0.083   |
| <i>Acinetobacter</i> spp.      | 1 (0.01)                               | 0 (0)                                | 0.32    |

**Supplemental Table S7.** Species-level identity of VAP organisms

| Family                    | Species                                    | Anti-anaerobic coverage | No anaerobic coverage | Total      |
|---------------------------|--------------------------------------------|-------------------------|-----------------------|------------|
| <i>Enterobacteriaceae</i> | <i>Escherichia coli</i>                    | 9 (0.12)                | 3 (0.11)              | 12         |
|                           | <i>Klebsiella pneumoniae</i>               | 8 (0.11)                | 1 (0.04)              | 9          |
|                           | <i>Klebsiella oxytoca</i>                  | 1 (0.01)                | 1 (0.04)              | 2          |
|                           | <i>Klebsiella (Enterobacter) aerogenes</i> | 2 (0.03)                | 0 (0)                 | 2          |
|                           | <i>Proteus mirabilis</i>                   | 2 (0.03)                | 0 (0)                 | 2          |
|                           | <i>Proteus vulgaris</i>                    | 1 (0.01)                | 0 (0)                 | 1          |
|                           | <i>Enterobacter cloacae complex</i>        | 5 (0.07)                | 1 (0.04)              | 6          |
|                           | <i>Serratia marcescens</i>                 | 6 (0.08)                | 0 (0)                 | 6          |
|                           | <i>Citrobacter species</i>                 | 1 (0.01)                | 0 (0)                 | 1          |
| <i>Staphylococcus</i>     | <i>Staphylococcus aureus</i>               | 11 (0.15)               | 8 (0.29)              | 19         |
| <i>Pseudomonas</i>        | <i>Pseudomonas aeruginosa</i>              | 7 (0.1)                 | 4 (0.14)              | 11         |
|                           | <i>Pseudomonas stutzeri</i>                | 1 (0.01)                | 0 (0)                 | 1          |
| <i>Streptococcus</i>      | <i>Streptococcus pneumoniae</i>            | 3 (0.04)                | 2 (0.07)              | 5          |
|                           | <i>Streptococcus anginosus group</i>       | 2 (0.03)                | 0 (0)                 | 2          |
|                           | <i>Streptococcus</i> (not Group A)         | 1 (0.01)                | 0 (0)                 | 1          |
|                           | <i>Beta-hemolytic Streptococcus</i>        | 1 (0.01)                | 0 (0)                 | 1          |
| <i>Corynebacterium</i>    | <i>Corynebacterium striatum</i>            | 2 (0.03)                | 1 (0.04)              | 3          |
|                           | <i>Corynebacterium amycolatum</i>          | 1 (0.01)                | 0 (0)                 | 1          |
| <i>Acinetobacter</i>      | <i>Acinetobacter baumannii</i>             | 1 (0.01)                | 0 (0)                 | 1          |
| <i>Stenotrophomonas</i>   | <i>Stenotrophomonas maltophilia</i>        | 3 (0.04)                | 0 (0)                 | 3          |
|                           | Probable VAP (no culture growth)           | 5 (0.07)                | 7 (0.25)              | 12         |
|                           | <b>Total</b>                               | <b>73 (1)</b>           | <b>28 (1)</b>         | <b>101</b> |

**Supplemental Table S8.** Comparison of causative organism for fatal nosocomial infections

| Organism                       | Anti-anaerobic coverage<br>(N = 1,942) | No anaerobic coverage<br>(N = 1,090) | P value |
|--------------------------------|----------------------------------------|--------------------------------------|---------|
| <i>Streptococcus</i> spp.      | 0 (0)                                  | 0.03 (1)                             | 0.32    |
| <i>Enterobacteriaceae</i> spp. | 0.29 (15)                              | 0.03 (1)                             | <0.001  |
| <i>Staphylococcus</i> spp.     | 0.02 (1)                               | 0.32 (11)                            | <0.001  |
| <i>Candida</i> spp.            | 0.1 (5)                                | 0.09 (3)                             | 0.91    |
| <i>Pseudomonas</i> spp.        | 0.06 (3)                               | 0.18 (6)                             | 0.11    |
| <i>Enterococcus</i> spp.       | 0.1 (5)                                | 0.06 (2)                             | 0.53    |
| <i>C. difficile</i>            | 0.44 (23)                              | 0.29 (10)                            | 0.16    |

p<2.2 \* 10<sup>-6</sup> by Chi-square test

**Supplemental Table S9.** Causative organisms for fatal nosocomial infection

| Antibiotic Coverage        | Infection site | Organism                       | N  |
|----------------------------|----------------|--------------------------------|----|
| Without anaerobic coverage | Bacteremia     | <i>Staphylococcus aureus</i>   | 11 |
|                            | Stool          | <i>C. difficile</i>            | 10 |
|                            | Bacteremia     | <i>Pseudomonas aeruginosa</i>  | 6  |
|                            | Bacteremia     | <i>Candida</i>                 | 3  |
|                            | Bacteremia     | <i>Enterococcus faecalis</i>   | 1  |
|                            | Bacteremia     | <i>Enterococcus faecium</i>    | 1  |
|                            | Bacteremia     | <i>Klebsiella pneumoniae</i>   | 1  |
|                            | Bacteremia     | <i>Streptococcus anginosus</i> | 1  |
| With anaerobic coverage    | Stool          | <i>C. difficile</i>            | 23 |
|                            | Bacteremia     | <i>Candida</i> spp.            | 5  |
|                            | Bacteremia     | <i>Escherichia coli</i>        | 4  |
|                            | Bacteremia     | <i>Enterococcus faecalis</i>   | 3  |
|                            | Bacteremia     | <i>Klebsiella pneumoniae</i>   | 3  |
|                            | Bacteremia     | <i>Enterobacter cloacae</i>    | 2  |
|                            | Bacteremia     | <i>Enterococcus faecium</i>    | 2  |
|                            | Bacteremia     | <i>Pseudomonas aeruginosa</i>  | 2  |
|                            | Ascites Fluid  | <i>Citrobacter freundii</i>    | 1  |
|                            | Urine Culture  | <i>Escherichia coli</i>        | 1  |
|                            | Tissue culture | <i>Pseudomonas aeruginosa</i>  | 1  |
|                            | Bacteremia     | <i>Klebsiella oxytoca</i>      | 1  |
|                            | Bacteremia     | <i>Proteus mirabilis</i>       | 1  |
|                            | Bacteremia     | <i>Serratia marescens</i>      | 1  |
|                            | Bacteremia     | <i>Staphylococcus aureus</i>   | 1  |

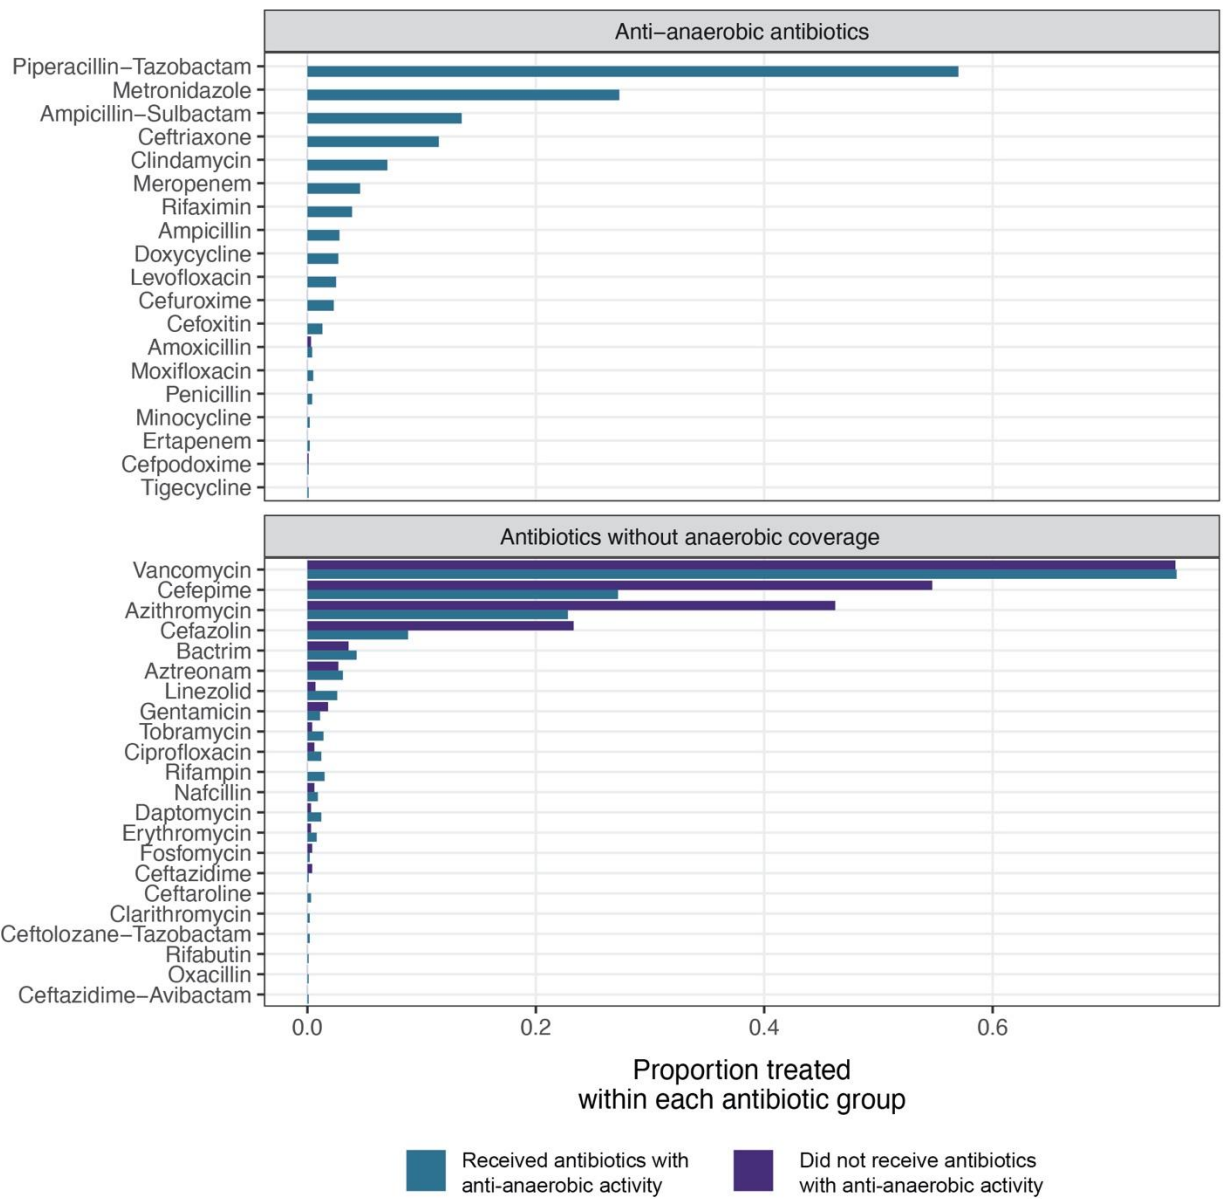

**Supplemental Figure 1.** Antibiotic use in study cohort. We characterized the antibiotic use in the eligible patient population classified by whether agents had significant anaerobic activity. Piperacillin-tazobactam, metronidazole, ampicillin-sulbactam, ceftriaxone, and clindamycin represented most anti-anaerobic antibiotic use. Vancomycin, cefepime, azithromycin, and cefazolin were the most commonly used antibiotics without anti-anaerobic activity.



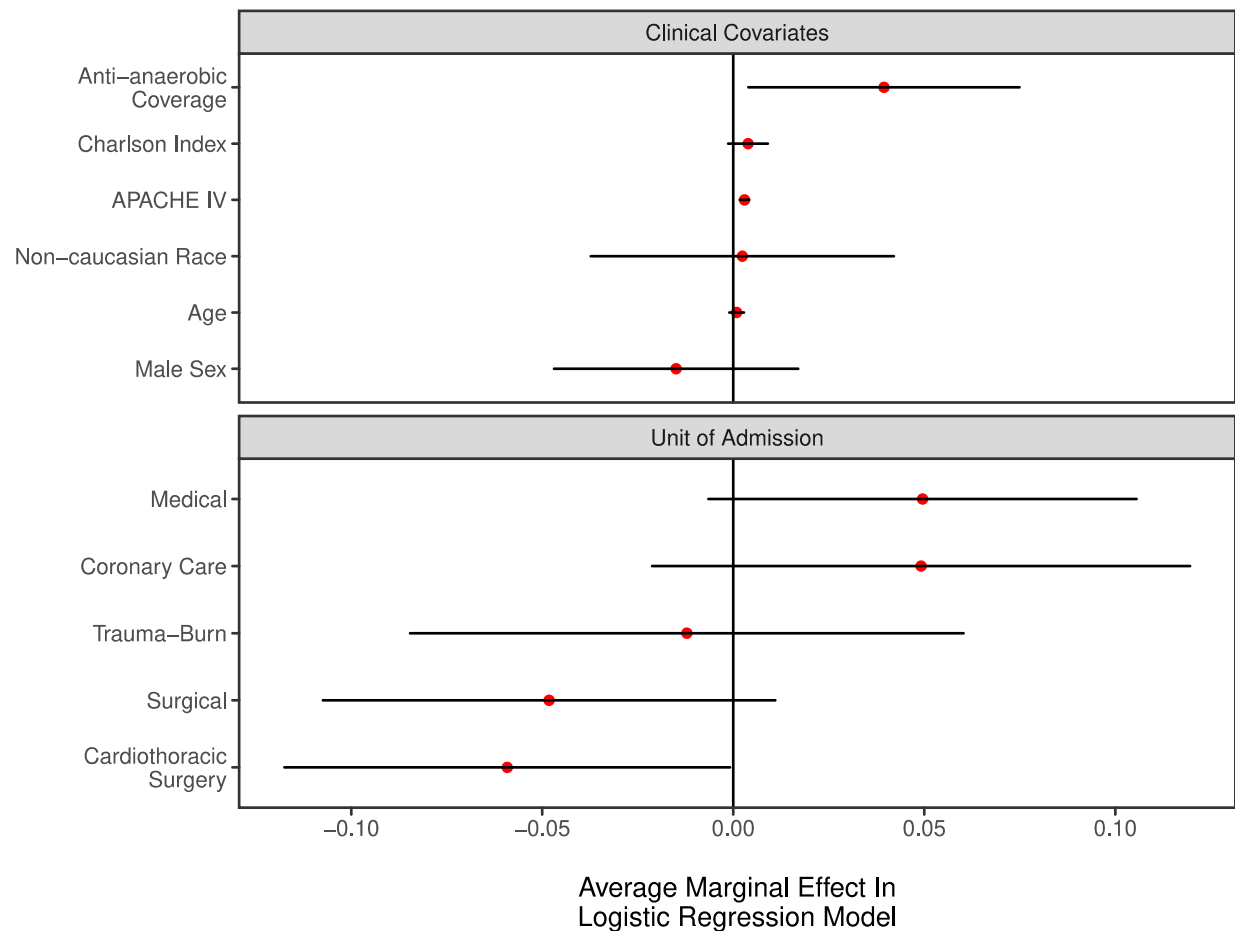

**Supplemental Figure 2:** Average marginal effect of covariates in a logistic regression model. We built a multi-variable logistic regression model of VAP or death within 30 days of mechanical ventilation. When adjusting for other covariates, anti-anaerobic antibiotic treatment was independently associated with an average marginal effect of 0.039 (95% CI 95% 0.0040-0.0075,  $p=0.029$ )

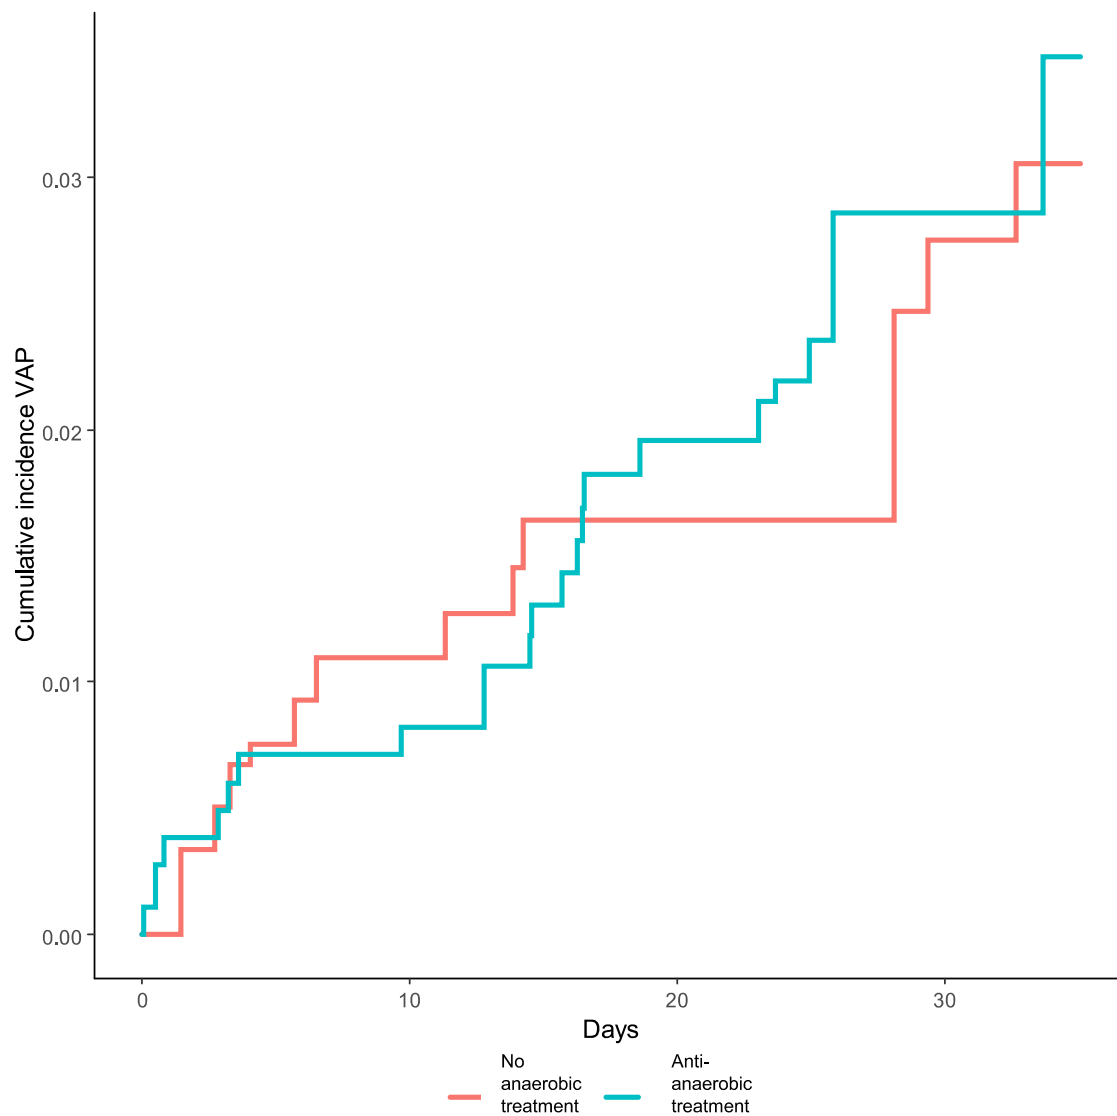

**Supplemental Figure 3.** No difference in the cumulative Incidence of VAP within 30 days. We calculated the cumulative incidence of VAP over 30 days for each treatment group. The average marginal probability of VAP at 30 days was 3.1% for patients who did not receive anti-anaerobic treatment and 3.5% for patients who did receive anti-anaerobic treatment ( $p=0.60$  by Gray's test)

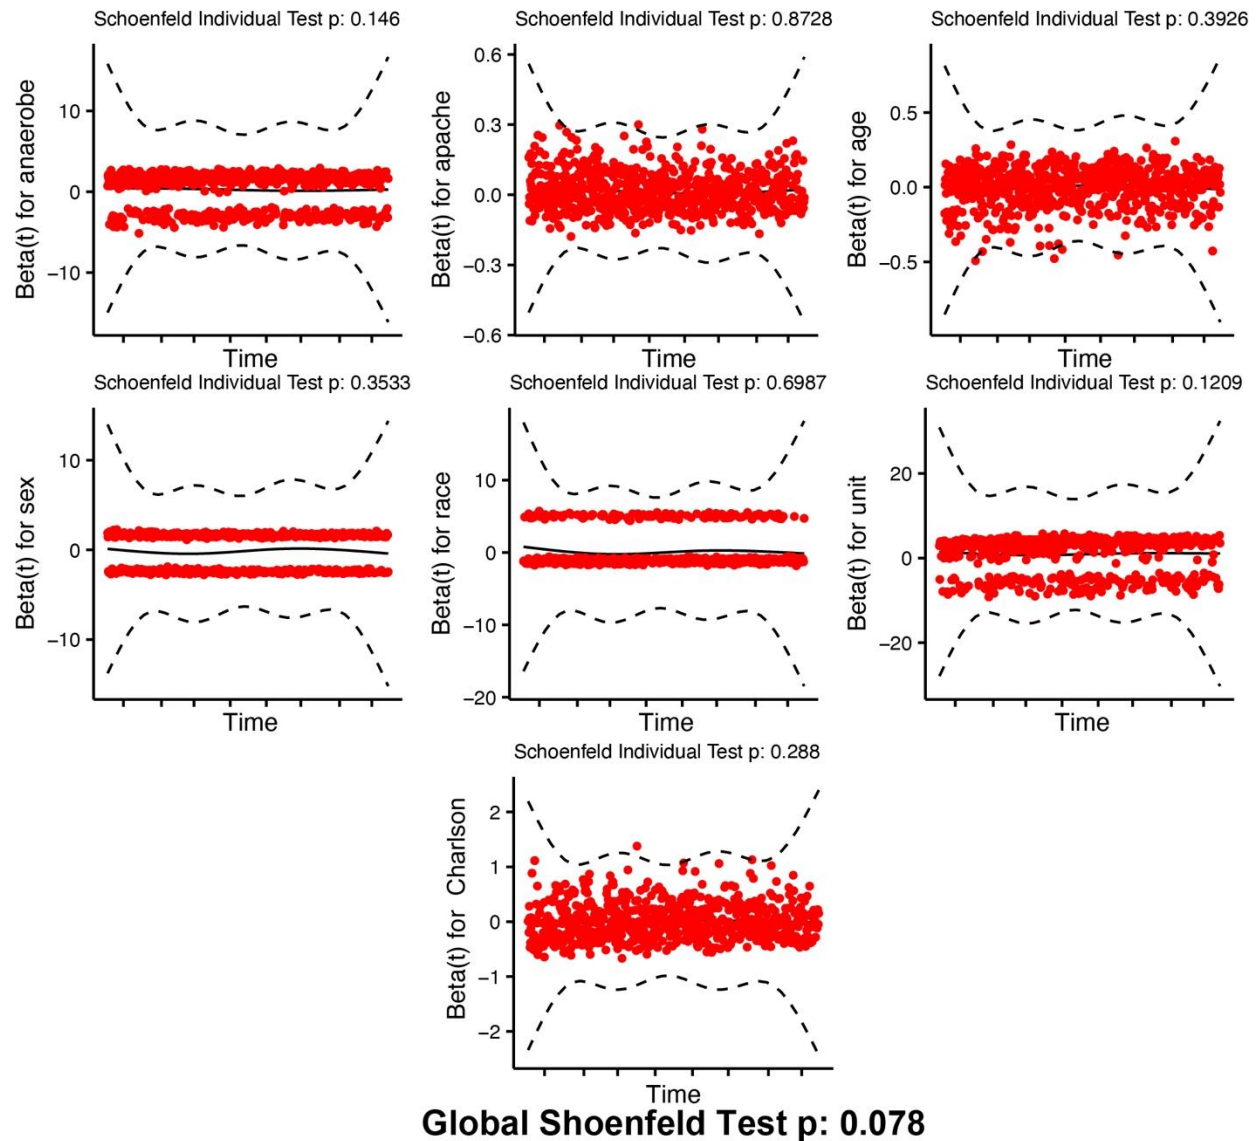

**Supplemental Figure 4:** The proportional hazards assumption for variables included in the Cox-regression model were tested by a goodness of fit test of correlation between Schoenfeld residuals and time as proposed by Grambsch and Therneau. The proportional hazards assumption was satisfied for the model as a whole ( $p=0.078$ ) and all individual variables.

## References

1. Hanauer DA, Mei Q, Law J, Khanna R, Zheng K. Supporting information retrieval from electronic health records: A report of University of Michigan's nine-year experience in developing and using the Electronic Medical Record Search Engine (EMERSE). 2015;55:290-300. Accessed March 29, 2021. <https://pubmed.ncbi.nlm.nih.gov/25979153/>
2. Hanauer DA, Wu DTY, Yang L, et al. Development and empirical user-centered evaluation of semantically-based query recommendation for an electronic health record search engine. *J Biomed Inform.* 2017;67:1-10. doi:10.1016/j.jbi.2017.01.013
3. Wilson W, Taubert KA, Gewitz M, et al. Prevention of infective endocarditis: Guidelines from the American Heart Association. *J Am Dent Assoc.* 2008;139(1 SUPPL.):S11-S24. doi:10.14219/JADA.ARCHIVE.2008.0346/ATTACHMENT/2C7D92F1-212E-4CC6-92DB-CE2127044077/MMC1.PDF
4. Smiley CJ, Tracy SL, Abt E, et al. Evidence-based clinical practice guideline on the nonsurgical treatment of chronic periodontitis by means of scaling and root planing with or without adjuncts. *J Am Dent Assoc.* 2015;146(7):525-535. doi:10.1016/J.ADAJ.2015.01.026
5. Brook I. Microbiology and Principles of Antimicrobial Therapy for Head and Neck Infections. *Infect Dis Clin North Am.* 2007;21(2):355-391. doi:10.1016/j.idc.2007.03.014
6. Lipsky BA, Berendt AR, Cornia PB, et al. 2012 Infectious Diseases Society of America Clinical Practice Guideline for the Diagnosis and Treatment of Diabetic Foot Infections. *Clin Infect Dis.* 2012;54(12):e132-e173. doi:10.1093/CID/CIS346
7. Solomkin JS, Mazuski JE, Bradley JS, et al. Diagnosis and Management of Complicated Intra-abdominal Infection in Adults and Children: Guidelines by the Surgical Infection Society and the Infectious Diseases Society of America. *Clin Infect Dis.* 2010;50(2):133-164. doi:10.1086/649554
8. Stevens DL, Bisno AL, Chambers HF, et al. Practice guidelines for the diagnosis and management of skin and soft tissue infections: 2014 update by the infectious diseases society of America. *Clin Infect Dis.* 2014;59(2):e10-e52. doi:10.1093/cid/ciu296
9. Lucas GM, Lechtzin N, Puryear DW, Yau LL, Flexner CW, Moore RD. Vancomycin-resistant and vancomycin-susceptible enterococcal bacteremia: comparison of clinical features and outcomes. *Clin Infect Dis.* 1998;26(5):1127-1133. Accessed July 23, 2018. <http://www.ncbi.nlm.nih.gov/pubmed/9597241>
10. Beezhold DW, Slaughter S, Hayden MK, et al. Skin colonization with vancomycin-resistant enterococci among hospitalized patients with bacteremia. *Clin Infect Dis.* 1997;24(4):704-706.
11. Donskey CJ, Chowdhry TK, Hecker MT, et al. Effect of Antibiotic Therapy on the Density of Vancomycin-Resistant Enterococci in the Stool of Colonized Patients. *N Engl J Med.* 2000;343(26):1925-1932. doi:10.1056/NEJM200012283432604
12. Bhalla A, Pultz NJ, Ray AJ, Høyen CK, Eckstein EC, Donskey CJ. Antianaerobic Antibiotic Therapy Promotes Overgrowth of Antibiotic-Resistant, Gram-Negative Bacilli and Vancomycin-Resistant Enterococci in the Stool of Colonized Patients. *Infect Control Hosp Epidemiol.* 2003;24:644-649. doi:10.1086/502267
13. Shono Y, Docampo MD, Peled JU, et al. Increased GVHD-related mortality with broad-spectrum antibiotic use after allogeneic hematopoietic stem cell transplantation in human patients and mice. *Sci Transl Med.* 2016;8(339). doi:10.1126/scitranslmed.aaf2311
14. Pettigrew MM, Gent JF, Kong Y, et al. Gastrointestinal Microbiota Disruption and Risk of Colonization with Carbapenem-resistant *Pseudomonas aeruginosa* in Intensive Care Unit Patients. *Clin Infect Dis.* 2019;69(4):604-613. doi:10.1093/cid/ciy936
15. Haak BW, Argelaguet R, Kinsella CM, et al. Integrative Transkingdom Analysis of the Gut Microbiome in Antibiotic Perturbation and Critical Illness. *mSystems.* 2021;6(2).

- doi:10.1128/MSYSTEMS.01148-20
16. Nseir S, Zerimech F, Fournier C, et al. Continuous Control of Tracheal Cuff Pressure and Microaspiration of Gastric Contents in Critically Ill Patients. *https://doi.org/10.1164/rccm.201104-0630OC*. 2012;184(9):1041-1047. doi:10.1164/RCCM.201104-0630OC
  17. Nseir S, Lorente L, Ferrer M, et al. Continuous control of tracheal cuff pressure for VAP prevention: a collaborative meta-analysis of individual participant data. *Ann Intensive Care*. 2015;5(1):1-9. doi:10.1186/s13613-015-0087-3
  18. Kollef M, Pittet D, García MS, et al. A Randomized Double-Blind Trial of Iseganan in Prevention of Ventilator-associated Pneumonia. *https://doi.org/10.1164/rccm.200504-656OC*. 2012;173(1):91-97. doi:10.1164/RCCM.200504-656OC
  19. Weng H, Li J-G, Mao Z, et al. Probiotics for Preventing Ventilator-Associated Pneumonia in Mechanically Ventilated Patients: A Meta-Analysis with Trial Sequential Analysis. *Front Pharmacol*. 2017;8:717. doi:10.3389/fphar.2017.00717
  20. Klompas M, Kleinman K, Khan Y, et al. Rapid and reproducible surveillance for ventilator-associated pneumonia. *Clin Infect Dis*. 2012;54(3):370-377. doi:10.1093/cid/cir832
  21. Magill SS, Klompas M, Balk R, et al. Developing a new, national approach to surveillance for ventilator-associated events. *Am J Crit Care*. 2013;22(6):469-473. doi:10.4037/ajcc.2013893
  22. Klompas M, Khan Y, Kleinman K, et al. Multicenter evaluation of a novel surveillance paradigm for complications of mechanical ventilation. *PLoS One*. 2011;6(3). doi:10.1371/journal.pone.0018062
  23. Runyon BA. Introduction to the revised American Association for the Study of Liver Diseases Practice Guideline management of adult patients with ascites due to cirrhosis 2012. *Hepatology*. 2013;57(4):1651-1653. doi:10.1002/hep.26359
  24. Gupta K, Hooton TM, Naber KG, et al. International clinical practice guidelines for the treatment of acute uncomplicated cystitis and pyelonephritis in women: A 2010 update by the Infectious Diseases Society of America and the European Society for Microbiology and Infectious Diseases. *Clin Infect Dis*. 2011;52(5):103-120. doi:10.1093/cid/ciq257
  25. Hooton TM, Bradley SF, Cardenas DD, et al. Diagnosis, prevention, and treatment of catheter-associated urinary tract infection in adults: 2009 international clinical practice guidelines from the infectious diseases society of America. *Clin Infect Dis*. 2010;50(5):625-663. doi:10.1086/650482
  26. Horan TC, Andrus M, Dudeck MA. CDC/NHSN surveillance definition of health care-associated infection and criteria for specific types of infections in the acute care setting. *Am J Infect Control*. 2008;36(5):309-332. doi:10.1016/j.ajic.2008.03.002
  27. Genealogical Death Indexing System. Accessed February 7, 2022. <https://vitalstats.michigan.gov/osr/gendisx/index.asp>
  28. Data Access - National Death Index. Accessed February 7, 2022. <https://www.cdc.gov/nchs/ndi/index.htm>
  29. Center for Health Statistics N. SECTION I-INSTRUCTIONS FOR CLASSIFYING THE UNDERLYING CAUSE OF DEATH, 2017.
  30. Woolf SH, Schoomaker H. Life Expectancy and Mortality Rates in the United States, 1959-2017. *JAMA - J Am Med Assoc*. 2019;322(20):1996-2016. doi:10.1001/jama.2019.16932
  31. R Development Core Team R. *R: A Language and Environment for Statistical Computing*. Vol 1.; 2019. doi:10.1007/978-3-540-74686-7
  32. Charlson ME, Pompei P, Ales KL, MacKenzie CR. A new method of classifying prognostic comorbidity in longitudinal studies: Development and validation. *J Chronic Dis*. 1987;40(5):373-383. doi:https://doi.org/10.1016/0021-9681(87)90171-8
  33. Radovanovic D, Seifert B, Urban P, et al. Validity of Charlson Comorbidity Index in

- patients hospitalised with acute coronary syndrome. Insights from the nationwide AMIS Plus registry 2002-2012. *Heart*. 2014;100(4):288-294. doi:10.1136/heartjnl-2013-304588
34. Quan H, Li B, Couris CM, et al. Updating and validating the charlson comorbidity index and score for risk adjustment in hospital discharge abstracts using data from 6 countries. *Am J Epidemiol*. 2011;173(6):676-682. doi:10.1093/aje/kwq433
  35. Grambsch PM, Therneau TM. Proportional hazards tests and diagnostics based on weighted residuals. *Biometrika*. 1994;81(3):515-526. doi:10.1093/BIOMET/81.3.515
  36. Therneau T. A Package for Survival Analysis in S. Published online 2015.
  37. Leeper TJ. *Margins: Marginal Effects for Model Objects*. R Package Version 0.3.26.; 2021. <https://cloud.r-project.org/web/packages/margins/index.html>
  38. Chanderraj R, Brown CA, Hinkle K, et al. Gut Microbiota Predict *Enterococcus* Expansion but Not Vancomycin-Resistant *Enterococcus* Acquisition. McMahon K, ed. *mSphere*. 2020;5(6). doi:10.1128/mSphere.00537-20
  39. Chanderraj R, Brown CA, Hinkle K, Falkowski N, Woods RJ, Dickson RP. The bacterial density of clinical rectal swabs is highly variable, correlates with sequencing contamination, and predicts patient risk of extraintestinal infection. *Microbiome* 2022 101. 2022;10(1):1-16. doi:10.1186/S40168-021-01190-Y
  40. Bates D, Mächler M, Bolker BM, Walker SC. Fitting linear mixed-effects models using lme4. *J Stat Softw*. 2015;67(1):1-48. doi:10.18637/jss.v067.i01
  41. Dickson RP, Erb-Downward JR, Falkowski NR, Hunter EM, Ashley SL, Huffnagle GB. The Lung Microbiota of Healthy Mice Are Highly Variable, Cluster by Environment, and Reflect Variation in Baseline Lung Innate Immunity. *Am J Respir Crit Care Med*. 2018;198(4):497-508. doi:10.1164/rccm.201711-2180OC
  42. Ashley SL, Sjoding MW, Popova AP, et al. Lung and gut microbiota are altered by hyperoxia and contribute to oxygen-induced lung injury in mice. *Sci Transl Med*. 2020;12(556). doi:10.1126/SCITRANSLMED.AAU9959
  43. Baker JM, Hinkle KJ, McDonald RA, et al. Whole lung tissue is the preferred sampling method for amplicon-based characterization of murine lung microbiota. *Microbiome*. 2021;9(1). doi:10.1186/S40168-021-01055-4
  44. Gray RJ. A Class of  $\mathbb{R}^n$ -Sample Tests for Comparing the Cumulative Incidence of a Competing Risk. *The Annals of Statistics* 1988: 16(3): 1141-1154, 1114.
  45. Gray R. *cmprsk*. 2.2-11 ed, 2021.
