# Supplementary material
Source: HighWire-hosted journal article supplement (https://erj.ersjournals.com/content/61/2/2200910)
Supplement: inline-supplementary-material-2 [file inline-supplementary-material-2.pdf]

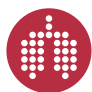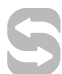

SHAREABLE PDF

# In critically ill patients, anti-anaerobic antibiotics increase risk of adverse clinical outcomes

Rishi Chanderraj <sup>1,2</sup>, Jennifer M. Baker <sup>3,4</sup>, Stephen G. Kay <sup>3</sup>, Christopher A. Brown <sup>3,5</sup>, Kevin J. Hinkle <sup>3</sup>, Daniel J. Fergle <sup>3</sup>, Roderick A. McDonald <sup>3</sup>, Nicole R. Falkowski <sup>3</sup>, Joseph D. Metcalf <sup>3</sup>, Keith S. Kaye <sup>6</sup>, Robert J. Woods <sup>1,2,7</sup>, Hallie C. Prescott <sup>3,8,9</sup>, Michael W. Sjoding <sup>3,7,8,10</sup> and Robert P. Dickson <sup>3,4,10</sup>

<sup>1</sup>Division of Infectious Diseases, Department of Internal Medicine, University of Michigan Medical School, Ann Arbor, MI, USA. <sup>2</sup>Medicine Service, Infectious Diseases Section, VA Ann Arbor Healthcare System, Ann Arbor, MI, USA. <sup>3</sup>Division of Pulmonary and Critical Care Medicine, Department of Internal Medicine, University of Michigan Medical School, Ann Arbor, MI, USA. <sup>4</sup>Department of Microbiology and Immunology, University of Michigan Medical School, Ann Arbor, MI, USA. <sup>5</sup>Institute for Research on Innovation and Science, Institute for Social Research, University of Michigan, Ann Arbor, MI, USA. <sup>6</sup>Division of Infectious Diseases, Department of Medicine, Rutgers-New Jersey Medical School, Newark, NJ, USA. <sup>7</sup>Computational Medicine and Bioinformatics, University of Michigan Medical School, Ann Arbor, MI, USA. <sup>8</sup>Institute for Healthcare Policy and Innovation, University of Michigan, Ann Arbor, MI, USA. <sup>9</sup>VA Center for Clinical Management Research, Ann Arbor, MI, USA. <sup>10</sup>Weil Institute for Critical Care Research and Innovation, Ann Arbor, MI, USA.

Corresponding author: Robert P. Dickson ([rodickso@med.umich.edu](mailto:rodickso@med.umich.edu))

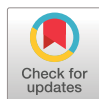

Shareable abstract (@ERSpublications)

**In an observational study of 3032 mechanically ventilated patients, early anti-anaerobic antibiotics increased mortality risk. In secondary studies, anti-anaerobic antibiotics disrupted patients' gut microbiota and worsened outcomes in mouse models.** <https://bit.ly/3BLbpvz>

**Cite this article as:** Chanderraj R, Baker JM, Kay SG, *et al.* In critically ill patients, anti-anaerobic antibiotics increase risk of adverse clinical outcomes. *Eur Respir J* 2023; 61: 2200910 [DOI: 10.1183/13993003.00910-2022].

This single-page version can be shared freely online.

The content of this work is not subject to copyright. Design and branding are copyright ©ERS 2023.

This version is distributed under the terms of the Creative Commons Attribution Non-Commercial Licence 4.0. For commercial reproduction rights and permissions contact [permissions@ersnet.org](mailto:permissions@ersnet.org)

Received: 4 May 2022  
Accepted: 16 Sept 2022

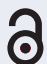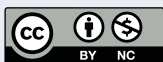

## Abstract

**Background** Critically ill patients routinely receive antibiotics with activity against anaerobic gut bacteria. However, in other disease states and animal models, gut anaerobes are protective against pneumonia, organ failure and mortality. We therefore designed a translational series of analyses and experiments to determine the effects of anti-anaerobic antibiotics on the risk of adverse clinical outcomes among critically ill patients.

**Methods** We conducted a retrospective single-centre cohort study of 3032 critically ill patients, comparing patients who did and did not receive early anti-anaerobic antibiotics. We compared intensive care unit outcomes (ventilator-associated pneumonia (VAP)-free survival, infection-free survival and overall survival) in all patients and changes in gut microbiota in a subcohort of 116 patients. In murine models, we studied the effects of anaerobe depletion in infectious (*Klebsiella pneumoniae* and *Staphylococcus aureus* pneumonia) and noninfectious (hyperoxia) injury models.

**Results** Early administration of anti-anaerobic antibiotics was associated with decreased VAP-free survival (hazard ratio (HR) 1.24, 95% CI 1.06–1.45), infection-free survival (HR 1.22, 95% CI 1.09–1.38) and overall survival (HR 1.14, 95% CI 1.02–1.28). Patients who received anti-anaerobic antibiotics had decreased initial gut bacterial density ( $p=0.00038$ ), increased microbiome expansion during hospitalisation ( $p=0.011$ ) and domination by Enterobacteriaceae spp. ( $p=0.045$ ). Enterobacteriaceae were also enriched among respiratory pathogens in anti-anaerobic-treated patients ( $p<2.2\times 10^{-16}$ ). In murine models, treatment with anti-anaerobic antibiotics increased susceptibility to Enterobacteriaceae pneumonia ( $p<0.05$ ) and increased the lethality of hyperoxia ( $p=0.0002$ ).

**Conclusions** In critically ill patients, early treatment with anti-anaerobic antibiotics is associated with increased mortality. Mechanisms may include enrichment of the gut with respiratory pathogens, but

increased mortality is incompletely explained by infections alone. Given consistent clinical and experimental evidence of harm, the widespread use of anti-anaerobic antibiotics should be reconsidered.
